# Supplementary material for: The Cross Attributes Flexible Substitution Logit: Uncovering Category Expansion and Share Impacts of Marketing Instruments
Source: Atypon-hosted journal article supplement (doi:10.1287/mksc.2014.0886), 2014-11-24
Supplement: mksc.2014.0886-sm-onlineappendix.pdf [file mksc.2014.0886-sm-onlineappendix.pdf]

**Online Appendix for**  
**“The Cross Attributes Flexible Substitution Logit:**  
**Uncovering Category Expansion and Share Impacts of Marketing Instruments”**  
**by Qiang Liu, Thomas J. Steenburgh, and Sachin Gupta**

**Online Appendix 1:**

Proof:

$$\frac{\partial P_k}{\partial v_j} = \begin{cases} \frac{P_j}{\delta_n} (1 + (\delta_n - 1)P_{j|B_n} - \delta_n P_j) & \text{for } k = j, \text{ and } k, j \in B_n \\ \frac{P_k}{\delta_n} ((\delta_n - 1)P_{j|B_n} - \delta_n P_j) & \text{for } k \neq j, \text{ and } k, j \in B_n \\ -P_k P_j & \text{for } k \neq j, \text{ and } k \in B_m, j \in B_n \end{cases}$$

$$\frac{\partial v_k}{\partial x_{ja}} = \begin{cases} \beta_a + \gamma_a & \text{for } k = j \\ \gamma_a & \text{for } k \neq j, \text{ and } k, j \in B_n \\ 0 & \text{for } k \neq j, \text{ and } k \in B_m, j \in B_n \end{cases}$$

$$\begin{aligned} \frac{\partial P_j}{\partial x_{ja}} &= \sum_{l=1}^J \frac{\partial P_j}{\partial v_l} \cdot \frac{\partial v_l}{\partial x_{ja}} \\ &= \frac{\partial P_j}{\partial v_j} \cdot \frac{\partial v_j}{\partial x_{ja}} + \sum_{\substack{l=1 \\ l \neq j}}^J \frac{\partial P_j}{\partial v_l} \cdot \frac{\partial v_l}{\partial x_{ja}} \\ &= \frac{P_j}{\delta_n} (1 + (\delta_n - 1)P_{j|B_n} - \delta_n P_j) (\beta_a + \gamma_a) + \sum_{l \in B_n, l \neq j} \frac{P_j}{\delta_n} ((\delta_n - 1)P_{l|B_n} - \delta_n P_l) \cdot \gamma_a \\ &= \frac{P_j}{\delta_n} \left( (1 + (\delta_n - 1)P_{j|B_n} - \delta_n P_j) (\beta_a + \gamma_a) + ((\delta_n - 1)(1 - P_{j|B_n}) - \delta_n (P_n - P_j)) \gamma_a \right) \\ &= \frac{P_j}{\delta_n} \left( (1 + (\delta_n - 1)P_{j|B_n} - \delta_n P_j) \beta_a + \delta_n (1 - P_n) \gamma_a \right) \end{aligned}$$

For  $k \neq j$  and  $k, j \in B_n$

$$\begin{aligned}
\frac{\partial P_k}{\partial x_{ja}} &= \sum_{l=1}^J \frac{\partial P_k}{\partial v_l} \cdot \frac{\partial v_l}{\partial x_{ja}} \\
&= \frac{\partial P_k}{\partial v_j} \cdot \frac{\partial v_j}{\partial x_{ja}} + \frac{\partial P_k}{\partial v_k} \cdot \frac{\partial v_k}{\partial x_{ja}} + \sum_{\substack{l \in B_n \\ l \neq j, k}} \frac{\partial P_k}{\partial v_l} \cdot \frac{\partial v_l}{\partial x_{ja}} \\
&= \frac{P_k}{\delta_n} ((\delta_n - 1)P_{j|B_n} - \delta_n P_j) (\beta_a + \gamma_a) + \frac{P_k}{\delta_n} (1 + (\delta_n - 1)P_{k|B_n} - \delta_n P_k) \cdot \gamma_a \\
&\quad + \sum_{\substack{l \in B_n \\ l \neq j, k}} \frac{P_k}{\delta_n} ((\delta_n - 1)P_{l|B_n} - \delta_n P_l) \cdot \gamma_a \\
&= \frac{P_k}{\delta_n} \left( ((\delta_n - 1)P_{j|B_n} - \delta_n P_j) (\beta_a + \gamma_a) + (1 + (\delta_n - 1)P_{k|B_n} - \delta_n P_k) \cdot \gamma_a \right) \\
&\quad + ((\delta_n - 1)(1 - P_{j|B_n} - P_{k|B_n}) \cdot \gamma_a - \delta_n (P_n - P_j - P_k) \cdot \gamma_a) \\
&= \frac{P_k}{\delta_n} \left( ((\delta_n - 1)P_{j|B_n} - \delta_n P_j) \beta_a + \delta_n (1 - P_n) \gamma_a \right)
\end{aligned}$$

For  $k \neq j$  and  $k \in B_m, j \in B_n$

$$\begin{aligned}
\frac{\partial P_k}{\partial x_{ja}} &= \sum_{l=1}^J \frac{\partial P_k}{\partial v_l} \cdot \frac{\partial v_l}{\partial x_{ja}} \\
&= \frac{\partial P_k}{\partial v_j} \cdot \frac{\partial v_j}{\partial x_{ja}} + \sum_{\substack{l \in B_n \\ l \neq j}} \frac{\partial P_k}{\partial v_l} \cdot \frac{\partial v_l}{\partial x_{ja}} \\
&= -P_k P_j (\beta_a + \gamma_a) - \sum_{\substack{l \in B_n \\ l \neq j}} P_k P_l \gamma_a \\
&= -P_k (P_j \beta_a + P_j \gamma_a + (P_n - P_j) \gamma_a) \\
&= -P_k (P_j \beta_a + P_n \gamma_a)
\end{aligned}$$

$$\frac{-\partial P_k / \partial x_{ja}}{\partial P_j / \partial x_{ja}} = \begin{cases} \frac{-P_k \left( ((\delta_n - 1)P_{j|B_n} - \delta_n P_j) \beta_a + (1 - P_n) \delta_n \gamma_a \right)}{P_j \left( (1 + (\delta_n - 1)P_{j|B_n} - \delta_n P_j) \beta_a + (1 - P_n) \delta_n \gamma_a \right)} & \text{for } k \neq j, \text{ and } k, j \in B_n \\ \frac{\delta_n P_k (P_j \beta_a + P_n \gamma_a)}{P_j \left( (1 + (\delta_n - 1)P_{j|B_n} - \delta_n P_j) \beta_a + (1 - P_n) \delta_n \gamma_a \right)} & \text{for } k \neq j, \text{ and } k \in B_m, j \in B_n \end{cases}$$

## **Online Appendix 2: Simulation Experiment**

The purpose of the simulation experiment is to assess the extent to which a standard RUM model with parameter heterogeneity can capture non-IPS patterns. Given the purpose of the experiment, we assume the source of growth substantially varies. In a market in which we assume competing brands use three marketing instruments, the first and third marketing instruments draw most of the demand (98.4% and 74.7% respectively) away from competing alternatives, whereas the second marketing instrument draws mostly from the outside option (81.5%). The experiment will show that the standard RUM models systematically underestimate these differences.

We assume there are four brands in the market and a no purchase option. The data generating process is based on the proposed CASFL model wherein we assume that the four brands are in one nest and the no-purchase option is in another. We generate data for 300 households, each of whom makes 50 purchase decisions. Individual consumers' preferences and responsiveness to instruments are assumed to follow a normal distribution, i.e.  $\theta_i \sim N(\theta, \Sigma)$ . The true value of  $\theta$  and the sample

mean of simulated values of  $\theta_i$  are given in Table A1. The values of  $\Sigma$  and the simulated variance-covariance of  $\beta_i$  are provided in Online Appendix 3 (Tables A3-A4).

In addition to the RC CAFSL model, we estimate two other models on the simulated data: a RC logit model and a RC GNL model.<sup>1</sup> Parameter estimates for the three models are shown in Table A1. Estimates for  $\Sigma$  are provided in Appendix 3 Table A5-A7. As might be expected, the RC CAFSL model outperforms the other models in terms of model fit. The real aim of the experiment, however, is not to compare the models based on fit but rather to better understand how well the benchmark models recover substitution patterns when the origins of demand vary across marketing instruments. We now turn to comparing the aggregate substitution patterns found by each model across the marketing instruments.

In Table A2, we present the own elasticities and the substitution matrix for the three marketing instruments of Brand 1. We note all three models do well in recovering elasticities of the three marketing instruments. Only the CAFSL model, however, is able to recover the substitution patterns found in the simulated data. For example, the CASFL implies the proportion of demand drawn from the outside option is 1.5%, 81.8% and 36.8% respectively across the marketing instruments,

---

<sup>1</sup> To better explore the flexibility offered by the RC GNL model, we considered two kinds of nesting structures. In the first structure we allow each alternative (including no-purchase) to belong to each of two nests with some probability. In the second structure, we set up three nests that are respectively, the nest for all brands, the nest for all alternatives including no-purchase, and the nest for the no-purchase option only. In this structure any brand can belong to each of the first two nests with a certain probability and the no-purchase option can belong to each of the latter two nests with a certain probability. The RC GNL with two nests outperforms the model with three nests in fit, and therefore we used this model to make our comparisons.

which accords well with the proportions actually found in the data of 1.6%, 81.5% and 35.3% respectively.

The substitution patterns predicted by the RC logit model and the RC GNL model do not accord well with the data. While adding heterogeneity to the logit and GNL models via the RC specification allows some differences to exist across the marketing instruments, these differences are small and do not necessarily reflect the true substitution patterns. The RC logit model implies the proportion of demand drawn from the outside option is 48.2%, 44.2% and 43.4% respectively across the marketing instruments. The RC GNL model implies the proportion of demand drawn from the outside option is 29.5%, 29.6% and 31.8% respectively<sup>2</sup>.

**Table 1: Simulation Study – Parameter Value and Estimates for RC Models**

|                       | True Model |                           | RC Logit |                  | RC GNL |                  | RC CAFSL |                  |
|-----------------------|------------|---------------------------|----------|------------------|--------|------------------|----------|------------------|
|                       | True Value | Sample Mean of $\theta_i$ | Mean     | 95% Interval     | Mean   | 95% Interval     | Mean     | 95% Interval     |
| Brand Intercept       |            |                           |          |                  |        |                  |          |                  |
| $\alpha_1$            | -0.9       | -0.797                    | -1.577   | (-1.756, -1.398) | -0.268 | (-0.361, -0.175) | -0.880   | (-1.081, -0.700) |
| $\alpha_2$            | -0.7       | -0.756                    | -1.524   | (-1.706, -1.345) | -0.245 | (-0.338, -0.154) | -0.841   | (-1.034, -0.661) |
| $\alpha_3$            | -0.75      | -0.750                    | -1.467   | (-1.637, -1.304) | -0.238 | (-0.330, -0.150) | -0.797   | (-0.985, -0.624) |
| $\alpha_4$            | -1.0       | -0.964                    | -1.752   | (-1.929, -1.581) | -0.337 | (-0.432, -0.243) | -1.028   | (-1.228, -0.846) |
| Marketing Instruments |            |                           |          |                  |        |                  |          |                  |
| $\beta_1$             | -3.0       | -2.935                    | -3.729   | (-3.919, -3.544) | -1.456 | (-1.615, -1.302) | -3.029   | (-3.279, -2.808) |
| $\beta_2$             | 0.25       | 0.222                     | 0.344    | (0.235, 0.453)   | 0.121  | (0.080, 0.164)   | 0.206    | (0.131, 0.281)   |
| $\beta_3$             | 1.35       | 1.382                     | 1.801    | (1.637, 1.967)   | 0.688  | (0.597, 0.785)   | 1.412    | (1.263, 1.564)   |

<sup>2</sup> We also estimate on the simulated data a RC CAFSL model that includes a parameter for the summation of instrument 3 (whereas the true value of  $\gamma_3$  is zero). As expected, the misspecified CAFSL model provides a non-significant estimate of  $\gamma_3$ , indicating that the proposed model can identify the absence of spill-over effects.

| Summation of Instruments            |      |       |        |   |   |        |                |       |                |  |
|-------------------------------------|------|-------|--------|---|---|--------|----------------|-------|----------------|--|
| $\gamma_1$                          | 0.35 | 0.378 | -      | - | - | -      | -              | 0.400 | (0.298, 0.502) |  |
| $\gamma_2$                          | 0.15 | 0.126 | -      | - | - | -      | -              | 0.103 | (0.031, 0.171) |  |
| $\gamma_3$                          | -    | -     | -      | - | - | -      | -              | -     | -              |  |
| Inclusive Value                     |      |       |        |   |   |        |                |       |                |  |
| $\delta_1$                          | 0.5  | -     | -      | - | - | 0.232  | (0.206, 0.261) | 0.523 | (0.487, 0.568) |  |
| $\delta_2$                          | -    | -     | -      | - | - | 0.352  | (0.284, 0.425) | -     | -              |  |
| Probability of Membership in Nest 1 |      |       |        |   |   |        |                |       |                |  |
| $\tau_1$                            | -    | -     | -      | - | - | 0.802  | (0.764, 0.840) | -     | -              |  |
| $\tau_2$                            | -    | -     | -      | - | - | 0.792  | (0.753, 0.832) | -     | -              |  |
| $\tau_3$                            | -    | -     | -      | - | - | 0.809  | (0.765, 0.856) | -     | -              |  |
| $\tau_4$                            | -    | -     | -      | - | - | 0.786  | (0.748, 0.823) | -     | -              |  |
| $\tau_5$                            | -    | -     | -      | - | - | 0.228  | (0.171, 0.281) | -     | -              |  |
| Log - ML*                           |      |       | -12244 |   |   | -11422 |                |       | -10641         |  |

\*Log Marginal Likelihood.

**Table 2: Substitution Matrices for Simulation Study**

|              | Simulated Data |           |           | RC Logit Model |           |           | RC Generalized Nested Logit Model |           |           | RC CAFSL Model |           |           |
|--------------|----------------|-----------|-----------|----------------|-----------|-----------|-----------------------------------|-----------|-----------|----------------|-----------|-----------|
|              | <i>I1</i>      | <i>I2</i> | <i>I3</i> | <i>I1</i>      | <i>I2</i> | <i>I3</i> | <i>I1</i>                         | <i>I2</i> | <i>I3</i> | <i>I1</i>      | <i>I2</i> | <i>I3</i> |
| B1           | -              | -         | -         | -              | -         | -         | -                                 | -         | -         | -              | -         | -         |
| B2           | 31.7           | 1.8       | 21.6      | 17.2           | 16.7      | 19.6      | 22.9                              | 22.2      | 23.4      | 32.1           | 6.9       | 21.6      |
| B3           | 34.1           | 4         | 22.3      | 17.6           | 20.6      | 19.3      | 24.1                              | 24.9      | 23.5      | 34.4           | 3.1       | 21.7      |
| B4           | 32.6           | 12.7      | 20.9      | 17.1           | 18.5      | 17.8      | 23.4                              | 23.3      | 21.3      | 32.1           | 8.2       | 19.9      |
| No-purch.    | 1.6            | 81.5      | 35.3      | 48.2           | 44.2      | 43.4      | 29.5                              | 29.6      | 31.8      | 1.5            | 81.8      | 36.8      |
| Total        | 100            | 100       | 100       | 100            | 100       | 100       | 100                               | 100       | 100       | 100            | 100       | 100       |
| Elasticities | -0.828         | 0.129     | 0.812     | -0.832         | 0.117     | 0.822     | -0.837                            | 0.110     | 0.801     | -0.832         | 0.112     | 0.812     |

*For each model, cell entries in each column indicate the percentage of sales increase of the brand B1 due to a 1% increase in its marketing instrument (e.g. I1) that is drawn from the alternative indicated in the row. For example, the logit model predicts that if B1 decreases its I1 by 1%, 31.7% of its incremental sales will come from the brand B2.*

**Online Appendix 3: Variance-Covariance Matrices for Simulation and Empirical Studies**

Table 3: Simulation Study ( $\Sigma$ )– True Values

|            | $\alpha_1$ | $\alpha_2$ | $\alpha_3$ | $\alpha_4$ | $\beta_1$ | $\beta_2$ | $\beta_3$ | $\gamma_1$ | $\gamma_2$ |
|------------|------------|------------|------------|------------|-----------|-----------|-----------|------------|------------|
| $\alpha_1$ | 1.0        | 0.1        | 0.1        | 0.1        | -0.1      | 0.1       | -0.1      | -0.1       | 0.1        |
| $\alpha_2$ | -0.1       | 1.0        | 0.1        | -0.1       | -0.1      | -0.1      | 0.1       | 0.1        | -0.1       |
| $\alpha_3$ | -0.1       | -0.1       | 1.0        | 0.1        | -0.1      | -0.1      | -0.1      | -0.1       | 0.1        |
| $\alpha_4$ | -0.1       | -0.1       | -0.1       | 1.0        | 0.1       | -0.1      | -0.1      | 0.1        | -0.1       |
| $\beta_1$  | -0.1       | -0.1       | 0.1        | -0.1       | 1.0       | 0.1       | 0.1       | 0.1        | -0.1       |
| $\beta_2$  | -0.1       | -0.1       | 0.1        | 0.1        | 0.1       | 0.25      | -0.1      | -0.1       | 0.1        |
| $\beta_3$  | -0.1       | 0.1        | -0.1       | -0.1       | 0.1       | 0.1       | 1.0       | 0.1        | -0.1       |
| $\gamma_1$ | -0.1       | -0.1       | -0.1       | -0.1       | 0.1       | -0.1      | 0.1       | 0.5        | 0.1        |
| $\gamma_2$ | -0.1       | -0.1       | 0.1        | -0.1       | -0.1      | 0.1       | 0.1       | -0.1       | 0.25       |

Table 4: Simulation Study ( $\Sigma$ )– Simulated Sample

|            | $\alpha_1$ | $\alpha_2$ | $\alpha_3$ | $\alpha_4$ | $\beta_1$ | $\beta_2$ | $\beta_3$ | $\gamma_1$ | $\gamma_2$ |
|------------|------------|------------|------------|------------|-----------|-----------|-----------|------------|------------|
| $\alpha_1$ | 1.079      | -0.15      | -0.136     | -0.103     | -0.042    | -0.091    | -0.074    | -0.105     | -0.095     |
| $\alpha_2$ | -0.15      | 1.032      | -0.041     | -0.094     | -0.207    | -0.075    | 0.107     | -0.117     | -0.059     |
| $\alpha_3$ | -0.136     | -0.041     | 0.953      | -0.15      | 0.246     | 0.047     | -0.165    | -0.084     | 0.052      |
| $\alpha_4$ | -0.103     | -0.094     | -0.15      | 0.951      | -0.101    | 0.123     | -0.041    | -0.098     | -0.072     |
| $\beta_1$  | -0.042     | -0.207     | 0.246      | -0.101     | 0.972     | 0.132     | 0.009     | 0.021      | -0.064     |
| $\beta_2$  | -0.091     | -0.075     | 0.047      | 0.123      | 0.132     | 0.24      | 0.083     | -0.124     | 0.079      |
| $\beta_3$  | -0.074     | 0.107      | -0.165     | -0.041     | 0.009     | 0.083     | 0.98      | 0.103      | 0.079      |
| $\gamma_1$ | -0.105     | -0.117     | -0.084     | -0.098     | 0.021     | -0.124    | 0.103     | 0.546      | -0.123     |
| $\gamma_2$ | -0.095     | -0.059     | 0.052      | -0.072     | -0.064    | 0.079     | 0.079     | -0.123     | 0.217      |

Table 5: Simulation Study ( $\Sigma$ ) – RC Logit

|            | $\alpha_1$ | $\alpha_2$ | $\alpha_3$ | $\alpha_4$ | $\beta_1$ | $\beta_2$ | $\beta_3$ |
|------------|------------|------------|------------|------------|-----------|-----------|-----------|
| $\alpha_1$ | 1.504      | -0.478     | -0.433     | -0.445     | -0.2      | -0.298    | 0.009     |
| $\alpha_2$ | -0.478     | 1.57       | -0.206     | -0.208     | -0.415    | -0.142    | 0.386     |
| $\alpha_3$ | -0.433     | -0.206     | 1.256      | -0.303     | 0.305     | 0.102     | -0.135    |
| $\alpha_4$ | -0.445     | -0.208     | -0.303     | 1.331      | -0.391    | 0.014     | 0.025     |
| $\beta_1$  | -0.2       | -0.415     | 0.305      | -0.391     | 1.544     | 0.023     | 0.198     |
| $\beta_2$  | -0.298     | -0.142     | 0.102      | 0.014      | 0.023     | 0.352     | 0.22      |
| $\beta_3$  | 0.009      | 0.386      | -0.135     | 0.025      | 0.198     | 0.22      | 1.272     |

Table 6: Simulation Study ( $\Sigma$ ) – RC Generalized Nested Logit

|            | $\alpha_1$ | $\alpha_2$ | $\alpha_3$ | $\alpha_4$ | $\beta_1$ | $\beta_2$ | $\beta_3$ |
|------------|------------|------------|------------|------------|-----------|-----------|-----------|
| $\alpha_1$ | 0.233      | -0.045     | -0.031     | -0.038     | -0.028    | -0.037    | -0.005    |
| $\alpha_2$ | -0.045     | 0.235      | -0.007     | -0.009     | -0.055    | -0.015    | 0.047     |
| $\alpha_3$ | -0.031     | -0.007     | 0.21       | -0.017     | 0.044     | 0.013     | -0.024    |
| $\alpha_4$ | -0.038     | -0.009     | -0.017     | 0.213      | -0.046    | 0.006     | -0.008    |
| $\beta_1$  | -0.028     | -0.055     | 0.044      | -0.046     | 0.237     | 0.016     | 0.023     |
| $\beta_2$  | -0.037     | -0.015     | 0.013      | 0.006      | 0.016     | 0.048     | 0.023     |
| $\beta_3$  | -0.005     | 0.047      | -0.024     | -0.008     | 0.023     | 0.023     | 0.206     |

Table 7: Simulation Study ( $\Sigma$ ) – RC CAFSL Logit

|            | $\alpha_1$ | $\alpha_2$ | $\alpha_3$ | $\alpha_4$ | $\beta_1$ | $\beta_2$ | $\beta_3$ | $\gamma_1$ | $\gamma_2$ |
|------------|------------|------------|------------|------------|-----------|-----------|-----------|------------|------------|
| $\alpha_1$ | 1.185      | -0.222     | -0.123     | -0.169     | -0.013    | -0.13     | -0.07     | -0.111     | -0.037     |
| $\alpha_2$ | -0.222     | 1.129      | -0.076     | -0.064     | -0.22     | -0.003    | 0.176     | -0.057     | -0.067     |
| $\alpha_3$ | -0.123     | -0.076     | 0.99       | -0.087     | 0.265     | 0.097     | -0.154    | -0.064     | 0.044      |
| $\alpha_4$ | -0.169     | -0.064     | -0.087     | 1.067      | -0.117    | 0.08      | -0.076    | -0.082     | -0.032     |
| $\beta_1$  | -0.013     | -0.22      | 0.265      | -0.117     | 1.116     | 0.13      | 0.037     | 0.022      | -0.005     |
| $\beta_2$  | -0.13      | -0.003     | 0.097      | 0.08       | 0.13      | 0.26      | 0.08      | -0.174     | 0.111      |
| $\beta_3$  | -0.07      | 0.176      | -0.154     | -0.076     | 0.037     | 0.08      | 1.064     | 0.119      | 0.116      |
| $\gamma_1$ | -0.111     | -0.057     | -0.064     | -0.082     | 0.022     | -0.174    | 0.119     | 0.532      | -0.11      |
| $\gamma_2$ | -0.037     | -0.067     | 0.044      | -0.032     | -0.005    | 0.111     | 0.116     | -0.11      | 0.19       |

Table 8: Yogurt Data ( $\Sigma$ ) – RC Logit

|                | $\alpha_1$ | $\alpha_2$ | $\alpha_3$ | $\alpha_4$ | $\beta_1$ | $\beta_2$ | $\beta_3$ | $\beta_{temp}$ |
|----------------|------------|------------|------------|------------|-----------|-----------|-----------|----------------|
| $\alpha_1$     | 6.179      | 3.531      | 5.192      | 6.789      | -3.764    | -0.466    | -0.069    | -0.039         |
| $\alpha_2$     | 3.531      | 4.65       | 4.36       | 5.186      | -2.464    | -0.328    | -0.152    | -0.035         |
| $\alpha_3$     | 5.192      | 4.36       | 8.362      | 6.804      | -4.483    | -0.524    | -0.05     | -0.045         |
| $\alpha_4$     | 6.789      | 5.186      | 6.804      | 9.764      | -6.543    | -0.533    | -0.125    | -0.038         |
| $\beta_1$      | -3.764     | -2.464     | -4.483     | -6.543     | 7.075     | 0.244     | 0.055     | -0.001         |
| $\beta_2$      | -0.466     | -0.328     | -0.524     | -0.533     | 0.244     | 0.066     | 0.005     | 0.004          |
| $\beta_3$      | -0.069     | -0.152     | -0.05      | -0.125     | 0.055     | 0.005     | 0.032     | <0.001         |
| $\beta_{temp}$ | -0.039     | -0.035     | -0.045     | -0.038     | -0.001    | 0.004     | <0.001    | 0.001          |

Table 9: Yogurt Data ( $\Sigma$ ) – RC Generalized Nested Logit

|                | $\alpha_1$ | $\alpha_2$ | $\alpha_3$ | $\alpha_4$ | $\beta_1$ | $\beta_2$ | $\beta_3$ | $\beta_{temp}$ |
|----------------|------------|------------|------------|------------|-----------|-----------|-----------|----------------|
| $\alpha_1$     | 2.302      | 1.194      | 2.172      | 2.299      | -0.13     | -0.378    | 0.039     | -0.024         |
| $\alpha_2$     | 1.194      | 1.936      | 1.977      | 2.021      | 0.41      | -0.371    | -0.005    | -0.024         |
| $\alpha_3$     | 2.172      | 1.977      | 4.27       | 4.011      | -1.055    | -0.666    | 0.027     | -0.03          |
| $\alpha_4$     | 2.299      | 2.021      | 4.011      | 4.091      | -1.012    | -0.655    | 0.033     | -0.031         |
| $\beta_1$      | -0.13      | 0.41       | -1.055     | -1.012     | 2.358     | 0.05      | -0.033    | -0.011         |
| $\beta_2$      | -0.378     | -0.371     | -0.666     | -0.655     | 0.05      | 0.136     | -0.004    | 0.006          |
| $\beta_3$      | 0.039      | -0.005     | 0.027      | 0.033      | -0.033    | -0.004    | 0.01      | <0.001         |
| $\beta_{temp}$ | -0.024     | -0.024     | -0.03      | -0.031     | -0.011    | 0.006     | <0.001    | 0.001          |

Table 10: Yogurt Data ( $\Sigma$ )– RC CAFSL Logit

|                | $\alpha_1$ | $\alpha_2$ | $\alpha_3$ | $\alpha_4$ | $\beta_1$ | $\beta_2$ | $\gamma_1$ | $\gamma_3$ | $\beta_{temp}$ |
|----------------|------------|------------|------------|------------|-----------|-----------|------------|------------|----------------|
| $\alpha_1$     | 0.844      | 0.098      | 0.061      | 0.135      | 1.111     | 0.046     | 0.025      | -0.367     | -0.001         |
| $\alpha_2$     | 0.098      | 1.391      | 0.301      | 0.021      | 2.267     | 0.072     | 0.033      | -0.761     | 0.001          |
| $\alpha_3$     | 0.061      | 0.301      | 1.325      | -0.217     | 0.999     | -0.037    | 0.068      | -0.279     | -0.005         |
| $\alpha_4$     | 0.135      | 0.021      | -0.217     | 0.373      | -0.092    | -0.025    | -0.03      | 0.125      | -0.003         |
| $\beta_1$      | 1.111      | 2.267      | 0.999      | -0.092     | 8.553     | 0.093     | 0.14       | -2.385     | -0.003         |
| $\beta_2$      | 0.046      | 0.072      | -0.037     | -0.025     | 0.093     | 0.073     | 0.014      | -0.168     | 0.004          |
| $\gamma_1$     | 0.025      | 0.033      | 0.068      | -0.03      | 0.14      | 0.014     | 0.032      | -0.09      | <0.001         |
| $\gamma_3$     | -0.367     | -0.761     | -0.279     | 0.125      | -2.385    | -0.168    | -0.09      | 1.167      | -0.012         |
| $\beta_{temp}$ | -0.001     | 0.001      | -0.005     | -0.003     | -0.003    | 0.004     | <0.001     | -0.012     | 0.001          |

Table 11: Statins Data ( $\Sigma$ ) – RC Logit

|            | $\alpha_1$ | $\alpha_2$ | $\alpha_3$ | $\alpha_4$ | $\beta_1$ | $\beta_2$ | $\beta_3$ |
|------------|------------|------------|------------|------------|-----------|-----------|-----------|
| $\alpha_1$ | 1.265      | 0.931      | 0.94       | 0.608      | 0.027     | -0.031    | 0.69      |
| $\alpha_2$ | 0.931      | 2.036      | 1.38       | 0.843      | 0.038     | -0.198    | 1.201     |
| $\alpha_3$ | 0.94       | 1.38       | 3.241      | 1.001      | 0.027     | -0.052    | 1.985     |
| $\alpha_4$ | 0.608      | 0.843      | 1.001      | 2.664      | 0.118     | 0.17      | 0.234     |
| $\beta_1$  | 0.027      | 0.038      | 0.027      | 0.118      | 0.021     | 0.008     | 0.002     |
| $\beta_2$  | -0.031     | -0.198     | -0.052     | 0.17       | 0.008     | 0.088     | -0.152    |
| $\beta_3$  | 0.69       | 1.201      | 1.985      | 0.234      | 0.002     | -0.152    | 1.862     |

Table 12: Statins Data ( $\Sigma$ ) – RC Generalized Nested Logit

|            | $\alpha_1$ | $\alpha_2$ | $\alpha_3$ | $\alpha_4$ | $\beta_1$ | $\beta_2$ | $\beta_3$ |
|------------|------------|------------|------------|------------|-----------|-----------|-----------|
| $\alpha_1$ | 0.493      | 0.387      | 0.278      | 0.251      | -0.005    | <0.001    | -0.064    |
| $\alpha_2$ | 0.387      | 0.593      | 0.359      | 0.3        | <0.001    | -0.009    | 0.022     |
| $\alpha_3$ | 0.278      | 0.359      | 0.634      | 0.254      | 0.005     | -0.017    | 0.17      |
| $\alpha_4$ | 0.251      | 0.3        | 0.254      | 0.616      | 0.018     | 0.043     | -0.053    |
| $\beta_1$  | -0.005     | <0.001     | 0.005      | 0.018      | 0.009     | 0.001     | 0.003     |
| $\beta_2$  | <0.001     | -0.009     | -0.017     | 0.043      | 0.001     | 0.03      | -0.013    |
| $\beta_3$  | -0.064     | 0.022      | 0.17       | -0.053     | 0.003     | -0.013    | 0.264     |

Table 13: Statins Data ( $\Sigma$ ) – RC CAFSL Logit

|            | $\alpha_1$ | $\alpha_2$ | $\alpha_3$ | $\alpha_4$ | $\beta_1$ | $\beta_2$ | $\beta_3$ | $\gamma_2$ | $\gamma_3$ |
|------------|------------|------------|------------|------------|-----------|-----------|-----------|------------|------------|
| $\alpha_1$ | 1.037      | 0.697      | 0.658      | 0.56       | 0.013     | -0.132    | 0.31      | 0.462      | 0.606      |
| $\alpha_2$ | 0.697      | 1.413      | 0.82       | 0.663      | 0.019     | -0.24     | 0.376     | 0.538      | 0.832      |
| $\alpha_3$ | 0.658      | 0.82       | 2.284      | 0.773      | 0.038     | -0.2      | 0.38      | 0.496      | 1.376      |
| $\alpha_4$ | 0.56       | 0.663      | 0.773      | 2.466      | 0.077     | 0.079     | 1.308     | 0.267      | 1.43       |
| $\beta_1$  | 0.013      | 0.019      | 0.038      | 0.077      | 0.017     | 0.001     | 0.039     | 0.003      | 0.048      |
| $\beta_2$  | -0.132     | -0.24      | -0.2       | 0.079      | 0.001     | 0.105     | 0.047     | -0.101     | -0.114     |
| $\beta_3$  | 0.31       | 0.376      | 0.38       | 1.308      | 0.039     | 0.047     | 0.9       | 0.185      | 0.715      |
| $\gamma_2$ | 0.462      | 0.538      | 0.496      | 0.267      | 0.003     | -0.101    | 0.185     | 0.399      | 0.345      |
| $\gamma_3$ | 0.606      | 0.832      | 1.376      | 1.43       | 0.048     | -0.114    | 0.715     | 0.345      | 1.722      |
